# Supplementary material for: The extracellular lactate-to-pyruvate ratio modulates the sensitivity to oxidative stress-induced apoptosis via the cytosolic NADH/NAD+ redox state
Source: PubMed Central journal article supplement (PMC7902596; doi:10.1007/s10495-020-01648-8), 2020-11-23

# Supplemental Figure 1

A

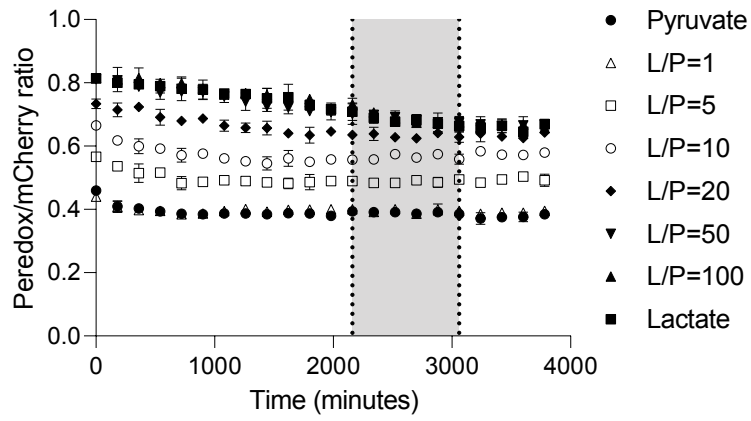

# Supplemental Figure 2

**A**

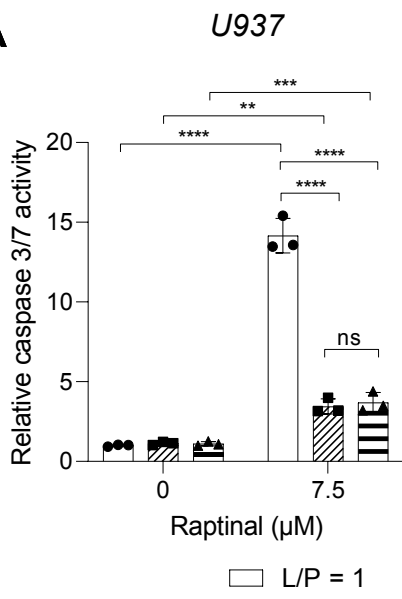

**B**

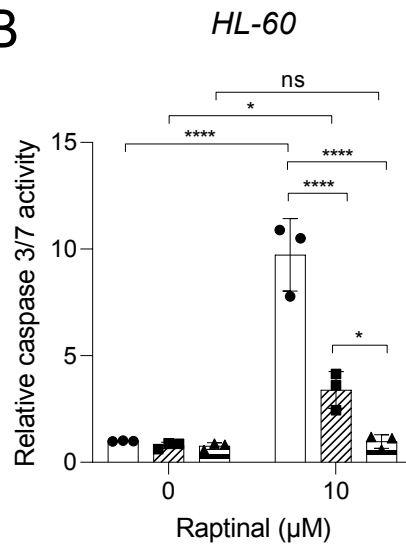

**C**

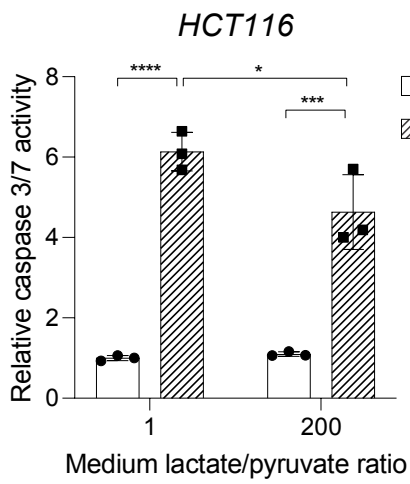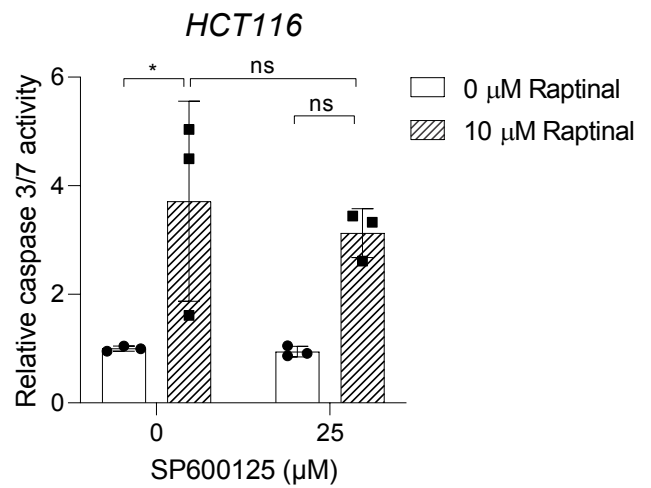

Supplement: 10495_2020_1648_MOESM2_ESM.pdf [file 10495_2020_1648_MOESM2_ESM.pdf]
